# Supplementary material
Source: PubMed Central journal article supplement (PMC2746134)

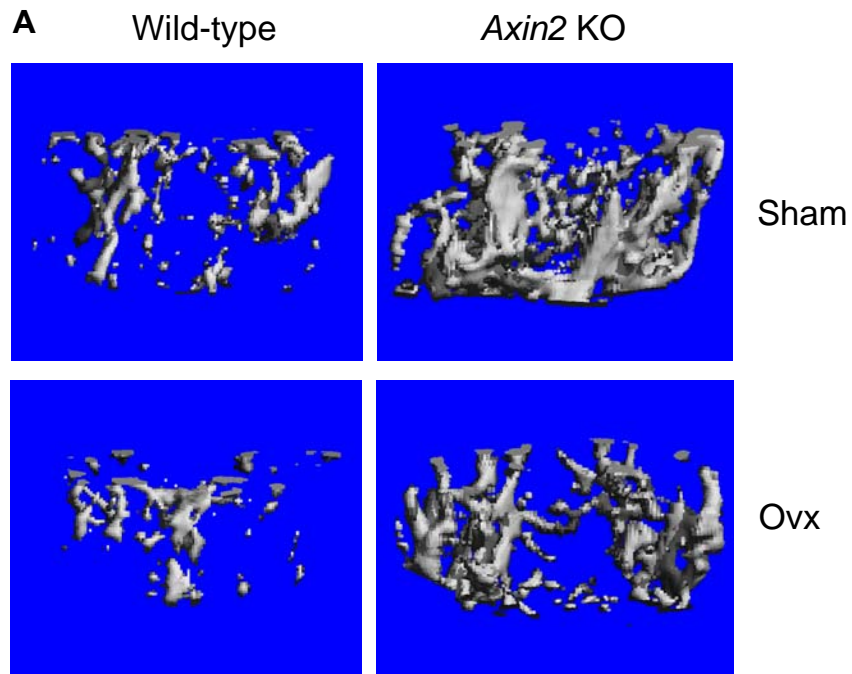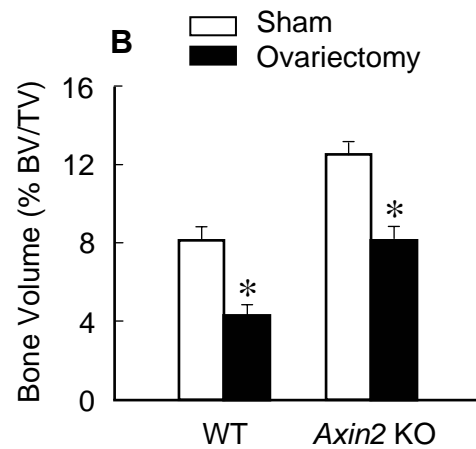

Supplement: jcs.051904_1.pdf [file jcs.051904_1.pdf]

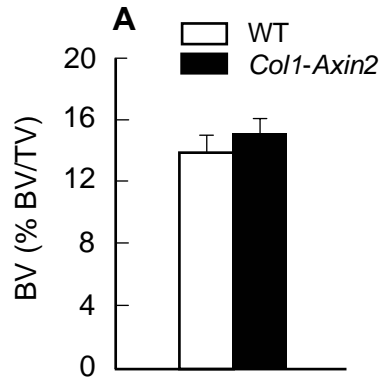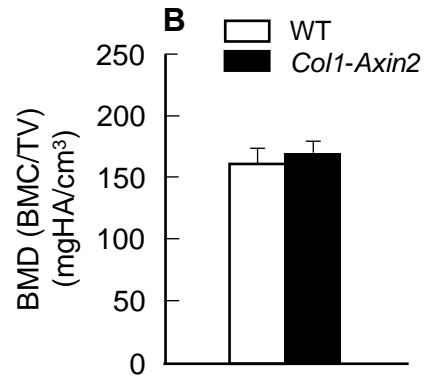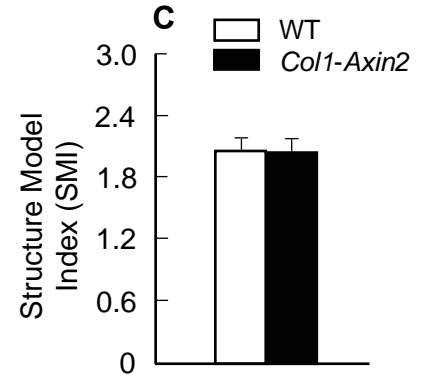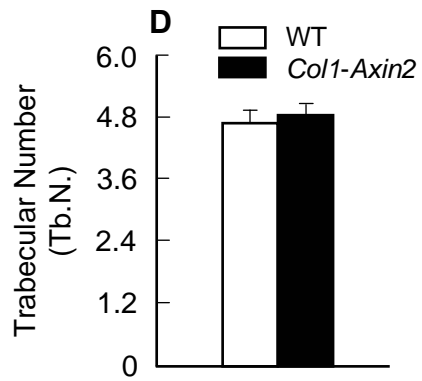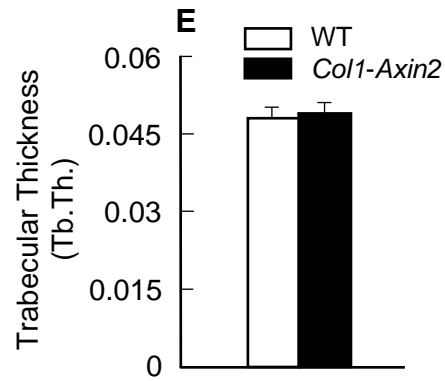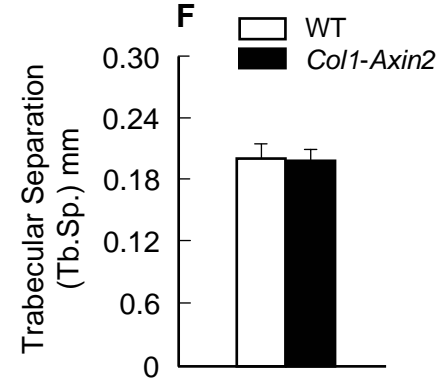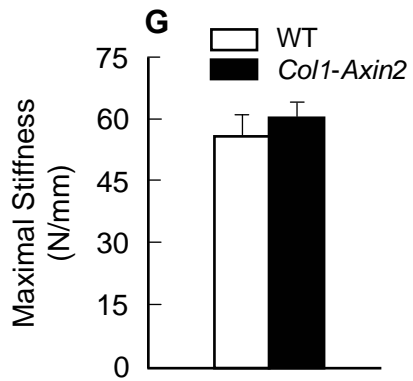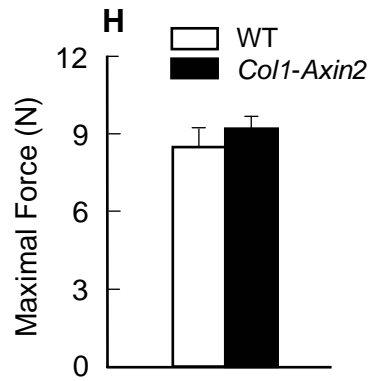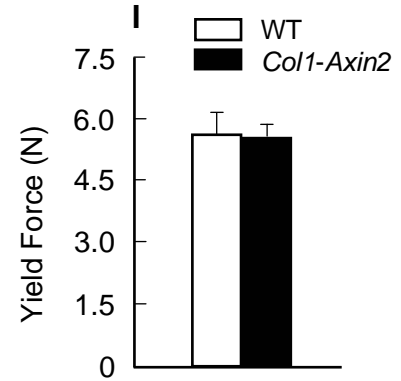

Supplement: jcs.051904_2.pdf [file jcs.051904_2.pdf]
